# Supplementary material for: Structural and congenital heart disease interventions: the role of three-dimensional printing
Source: Neth Heart J. 2017 Jan 12;25(2):65–75. doi: 10.1007/s12471-016-0942-3 (PMC5260628; doi:10.1007/s12471-016-0942-3)
Supplement: Supplementary file 1 — Comprehensive literature search results [file 12471_2016_942_MOESM1_ESM.docx]

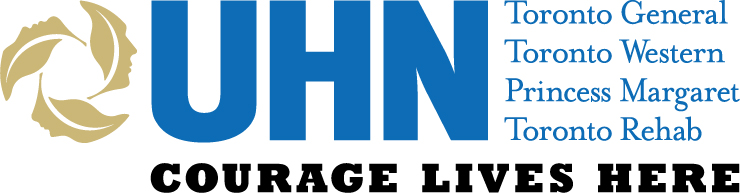


# UHN Health Sciences Libraries

# Literature Search Results

| | **Ovid MEDLINE(R)**1946 to July Week 1 2016 | | | | | --- | --- | --- | --- | | **#** | **Searches** | **Results** | **Type** | |  | | | | | | | | 1 | Printing, Three-Dimensional/ | 627 | Advanced |  |  |  | | 2 | (three dimension* adj3 (print* or model* or manufactur*)).ti,ab. | 11037 | Advanced |  |  |  | | 3 | (3D adj3 (print* or model* or manufactur*)).ti,ab. | 8791 | Advanced |  |  |  | | 4 | (3-D adj3 (print* or model* or manufactur*)).ti,ab. | 1720 | Advanced |  |  |  | | 5 | rapid prototyp*.ti,ab. | 1344 | Advanced |  |  |  | | 6 | additive manufactur*.ti,ab. | 195 | Advanced |  |  |  | | 7 | stereolithograph*.ti,ab. | 677 | Advanced |  |  |  | | 8 | selective laser sinter*.ti,ab. | 151 | Advanced |  |  |  | | 9 | selective laser melt*.ti,ab. | 75 | Advanced |  |  |  | | 10 | fused deposition model*.ti,ab. | 89 | Advanced |  |  |  | | 11 | or/1-7 | 21668 | Advanced |  |  |  | | 12 | exp Cardiac Catheterization/ | 45329 | Advanced |  |  |  | | 13 | exp Cardiovascular Surgical Procedures/ | 326759 | Advanced |  |  |  | | 14 | exp Heart Diseases/ | 985497 | Advanced |  |  |  | | 15 | exp Heart Defects, Congenital/ | 134533 | Advanced |  |  |  | | 16 | exp Cardiology/ | 16553 | Advanced |  |  |  | | 17 | or/12-16 | 1190088 | Advanced |  |  |  | | 18 | 11 and 17 | 635 | Advanced |  |  |  | | 19 | electrophysiolog*.ti,ab. | 83231 | Advanced |  |  |  | | 20 | 18 not 19 | 576 | Advanced |  |  |  | | 21 | remove duplicates from 20 | 555 | Advanced |  |  |  | | 22 | animals/ not (animals/ and humans/) | 4243994 | Advanced |  |  |  | | 23 | 21 not 22 | 496 | Advanced |  |  |  | | 24 | limit 23 to yr="2000 -Current" | 445 | Advanced |  |  |  | |
| --- | --- | --- | --- | --- | --- | --- | --- | --- | --- | --- | --- | --- | --- | --- | --- | --- | --- | --- | --- | --- | --- | --- | --- | --- | --- | --- | --- | --- | --- | --- | --- | --- | --- | --- | --- | --- | --- | --- | --- | --- | --- | --- | --- | --- | --- | --- | --- | --- | --- | --- | --- | --- | --- | --- | --- | --- | --- | --- | --- | --- | --- | --- | --- | --- | --- | --- | --- | --- | --- | --- | --- | --- | --- | --- | --- | --- | --- | --- | --- | --- | --- | --- | --- | --- | --- | --- | --- | --- | --- | --- | --- | --- | --- | --- | --- | --- | --- | --- | --- | --- | --- | --- | --- | --- | --- | --- | --- | --- | --- | --- | --- | --- | --- | --- | --- | --- | --- | --- | --- | --- | --- | --- | --- | --- | --- | --- | --- | --- | --- | --- | --- | --- | --- | --- | --- | --- | --- | --- | --- | --- | --- | --- | --- | --- | --- | --- | --- | --- | --- | --- | --- | --- | --- | --- | --- | --- | --- | --- | --- | --- | --- | --- | --- | --- | --- | --- | --- | --- | --- | --- | --- | --- | --- | --- | --- | --- | --- | --- | --- | --- | --- | --- | --- |

| | **Epub Ahead of Print and In-Process & Other Non-Indexed Citations Ovid MEDLINE(R)**July 18, 2016 | | | | | --- | --- | --- | --- | | **#** | **Searches** | **Results** | **Type** | |  | | | | | | | | 1 | (three dimension* adj3 (print* or model* or manufactur*)).ti,ab. | 2357 | Advanced |  |  |  | | 2 | (3D adj3 (print* or model* or manufactur*)).ti,ab. | 2866 | Advanced |  |  |  | | 3 | (3-D adj3 (print* or model* or manufactur*)).ti,ab. | 318 | Advanced |  |  |  | | 4 | rapid prototyp*.ti,ab. | 351 | Advanced |  |  |  | | 5 | additive manufactur*.ti,ab. | 205 | Advanced |  |  |  | | 6 | stereolithograph*.ti,ab. | 194 | Advanced |  |  |  | | 7 | selective laser sinter*.ti,ab. | 34 | Advanced |  |  |  | | 8 | selective laser melt*.ti,ab. | 46 | Advanced |  |  |  | | 9 | fused deposition model*.ti,ab. | 51 | Advanced |  |  |  | | 10 | or/1-9 | 5555 | Advanced |  |  |  | | 11 | cardio*.ti,ab. | 58522 | Advanced |  |  |  | | 12 | cardiac*.ti,ab. | 39669 | Advanced |  |  |  | | 13 | heart disease*.ti,ab. | 10680 | Advanced |  |  |  | | 14 | heart defect*.ti,ab. | 774 | Advanced |  |  |  | | 15 | transcatheter*.ti,ab. | 2369 | Advanced |  |  |  | | 16 | or/11-15 | 91525 | Advanced |  |  |  | | 17 | 10 and 16 | 164 | Advanced |  |  |  | | 18 | electrophysiolog*.ti,ab. | 6362 | Advanced |  |  |  | | 19 | 17 not 18 | 156 | Advanced |  |  |  | | 20 | remove duplicates from 19 | 156 | Advanced |  |  |  | | 21 | limit 20 to yr="2000 -Current" | 151 | Advanced |  |  |  | |
| --- | --- | --- | --- | --- | --- | --- | --- | --- | --- | --- | --- | --- | --- | --- | --- | --- | --- | --- | --- | --- | --- | --- | --- | --- | --- | --- | --- | --- | --- | --- | --- | --- | --- | --- | --- | --- | --- | --- | --- | --- | --- | --- | --- | --- | --- | --- | --- | --- | --- | --- | --- | --- | --- | --- | --- | --- | --- | --- | --- | --- | --- | --- | --- | --- | --- | --- | --- | --- | --- | --- | --- | --- | --- | --- | --- | --- | --- | --- | --- | --- | --- | --- | --- | --- | --- | --- | --- | --- | --- | --- | --- | --- | --- | --- | --- | --- | --- | --- | --- | --- | --- | --- | --- | --- | --- | --- | --- | --- | --- | --- | --- | --- | --- | --- | --- | --- | --- | --- | --- | --- | --- | --- | --- | --- | --- | --- | --- | --- | --- | --- | --- | --- | --- | --- | --- | --- | --- | --- | --- | --- | --- | --- | --- | --- | --- | --- | --- | --- | --- | --- | --- | --- | --- | --- | --- | --- | --- | --- | --- | --- | --- | --- |

| **Embase**1974 to 2016 July 18 | | | |
| --- | --- | --- | --- |
| **#** | **Searches** | **Results** | **Type** |
|  | | | | | | |
| 1 | three dimensional printing/ | 1245 | Advanced |  |  |  |
| 2 | (three dimension* adj3 (print* or model* or manufactur*)).ti,ab. | 13944 | Advanced |  |  |  |
| 3 | (3D adj3 (print* or model* or manufactur*)).ti,ab. | 14765 | Advanced |  |  |  |
| 4 | (3-D adj3 (print* or model* or manufactur*)).ti,ab. | 2498 | Advanced |  |  |  |
| 5 | rapid prototyp*.ti,ab. | 1920 | Advanced |  |  |  |
| 6 | additive manufactur*.ti,ab. | 349 | Advanced |  |  |  |
| 7 | stereolithograph*.ti,ab. | 892 | Advanced |  |  |  |
| 8 | selective laser sinter*.ti,ab. | 219 | Advanced |  |  |  |
| 9 | selective laser melt*.ti,ab. | 111 | Advanced |  |  |  |
| 10 | fused deposition model*.ti,ab. | 148 | Advanced |  |  |  |
| 11 | or/1-10 | 31499 | Advanced |  |  |  |
| 12 | heart catheterization/ | 55582 | Advanced |  |  |  |
| 13 | exp cardiovascular surgery/ | 571008 | Advanced |  |  |  |
| 14 | exp heart disease/ | 1528943 | Advanced |  |  |  |
| 15 | exp congenital heart malformation/ | 117364 | Advanced |  |  |  |
| 16 | cardiology/ | 91357 | Advanced |  |  |  |
| 17 | or/12-16 | 1890187 | Advanced |  |  |  |
| 18 | 11 and 17 | 1304 | Advanced |  |  |  |
| 19 | exp electrophysiology/ | 790821 | Advanced |  |  |  |
| 20 | electrophysiolog*.ti,ab. | 110093 | Advanced |  |  |  |
| 21 | 19 or 20 | 824653 | Advanced |  |  |  |
| 22 | 18 not 21 | 1098 | Advanced |  |  |  |
| 23 | remove duplicates from 22 | 1072 | Advanced |  |  |  |
| 24 | (exp animals/ or exp animal experimentation/ or nonhuman/) not ((exp animals/ or exp animal experimentation/ or nonhuman/) and exp human/) | 5953040 | Advanced |  |  |  |
| 25 | 23 not 24 | 956 | Advanced |  |  |  |
| 26 | (conference abstract or conference paper or conference proceeding or conference review).pt. | 3048271 | Advanced |  |  |  |
| 27 | 25 not 26 | 577 | Advanced |  |  |  |
| 28 | limit 27 to yr="2000 -Current" | 529 | Advanced |  |  |  |
| 29 | limit 25 to yr="2015 -Current" | 256 | Advanced |  |  |  |
| 30 | 28 or 29 | 640 | Advanced |  |  |  |
|  | | |  |  |  |  |
